# Supplementary material for: Mechanical bonding of rigid MORFs using a tetratopic rotaxane
Source: Royal Society of Chemistry journal article supplement (doi:10.1039/d4cc02065k), 2024-01-01
Supplement: d4cc02065k1.pdf [file d4cc02065k1.pdf]

Supporting Information

# Mechanical bonding of rigid MORFs using a tetratopic rotaxane

Adrian Saura-Sanmartin,<sup>a</sup> Guillermo Cutillas-Font,<sup>a</sup> Alberto Martinez-Cuezva,<sup>a</sup> Mateo Alajarin,<sup>a</sup> Fátima Esteban-Betegón,<sup>b</sup> Pilar Pena-Sánchez,<sup>b</sup> Felipe Gándara,<sup>b,\*</sup> Jose Berna<sup>a,\*</sup>

<sup>a</sup> Departamento de Química Orgánica, Facultad de Química, Regional Campus of International Excellence “Campus Mare Nostrum”, Universidad de Murcia, 30100, Murcia, Spain; <sup>b</sup> Departamento de Nuevas Arquitecturas en Química de Materiales, Instituto de Ciencia de Materiales de Madrid (ICMM-CSIC), Sor Juana Inés de la Cruz 3, 28049, Madrid, Spain.

|                                                                         |            |
|-------------------------------------------------------------------------|------------|
| <b>Table of Contents.....</b>                                           | <b>S2</b>  |
| <b>1. General experimental section.....</b>                             | <b>S3</b>  |
| <b>2. Synthesis of tetratopic ligand 1.....</b>                         | <b>S4</b>  |
| <b>3. Synthesis of UMUMOFs-7 and -8.....</b>                            | <b>S8</b>  |
| <b>4. Scanning Electron Microscopy.....</b>                             | <b>S10</b> |
| <b>5. Thermogravimetric Analysis.....</b>                               | <b>S10</b> |
| <b>6. Adsorption experiments.....</b>                                   | <b>S11</b> |
| <b>7. X-ray Powder Diffraction Analysis.....</b>                        | <b>S12</b> |
| <b>8. Infrared Spectroscopy.....</b>                                    | <b>S13</b> |
| <b>9. Crystal data and structure refinement for UMUMOFs-7 and -8...</b> | <b>S14</b> |
| <b>10. X-ray diffraction analyses using different solvents.....</b>     | <b>S19</b> |
| <b>11. <sup>1</sup>H and <sup>13</sup>C NMR spectra.....</b>            | <b>S22</b> |

## 1. General experimental section

Unless stated otherwise, all reagents were purchased from Aldrich Chemicals and used without further purification. HPLC grade solvents (Scharlab) were nitrogen saturated and were dried and deoxygenated using an Innovative Technology Inc. Pure-Solv 400 Solvent Purification System (Pure Solvent Solutions, Herten, Netherlands). Column chromatography was carried out using silica gel (60 Å, 70-200 µm, SDS) as stationary phase, and TLC was performed on precoated silica gel on aluminum cards (0.25 mm thick, with fluorescent indicator 254 nm, Fluka) and observed under UV light. All melting points were determined on a Kofler hot-plate melting point apparatus and are uncorrected. <sup>1</sup>H- and <sup>13</sup>C-NMR spectra were recorded at 298 K on a Bruker Avance 300 and 400 MHz instruments (Bruker, Massachusetts, USA). <sup>1</sup>H-NMR chemical shifts are reported relative to Me<sub>4</sub>Si and were referenced via residual proton resonances of the corresponding deuterated solvent, whereas <sup>13</sup>C NMR spectra are reported relative to Me<sub>4</sub>Si using the carbon signals of the deuterated solvent. Abbreviations of coupling patterns are as follows: br, broad; s, singlet; d, doublet; t, triplet; q, quadruplet; m, multiplet. Coupling constants (*J*) are expressed in Hz. High-resolution mass spectra (HRMS) were obtained using a time-of-flight (TOF) instrument equipped with electrospray ionization (ESI). Scanning Electron Microscopy (SEM) images were obtained with a JEOL JSM-6100 Scanning Microscope (200 kV) (JEOL, Tokyo, Japan). SEM samples were prepared by deposition of corresponding MOFs on a glass sample holder and subsequent coated with gold. Optical microscope images were obtained with a 48-megapixel Sony IMX586 quad camera attached to a stereomicroscope OPTIKA SLX-1 (OPTIKA Italy, Ponterarica, Italy). The infrared spectra of the different compounds were measured using a JASCO ATR FTIR-4700 (JASCO Analytica Spain, Madrid, Spain). Microanalyses were performed on a Leco CHNS-932 Elemental Analyser (Leco, Michigan, USA). The thermogravimetric analyses were performed on a SDT 2960 simultaneous DTA-TGA analyser (TA Instruments, New Castle, USA). X-ray Powder Diffraction Analysis (XRPD) pattern of grinded crystals was collected in a Bruker D8 ADVANCE Powder X-ray diffractometer (Bruker, Massachusetts, USA). Single crystal X-ray structures were collected in a Bruker D8QUEST diffractometer (Bruker, Massachusetts, USA). CO<sub>2</sub> adsorption experiments were carried out using a surface area and pore size analyzer Autosorb 6iSA QUANTACHROME (Quantachrome corporation, Florida, USA).

## 2. Synthesis of tetratopic ligand **1**

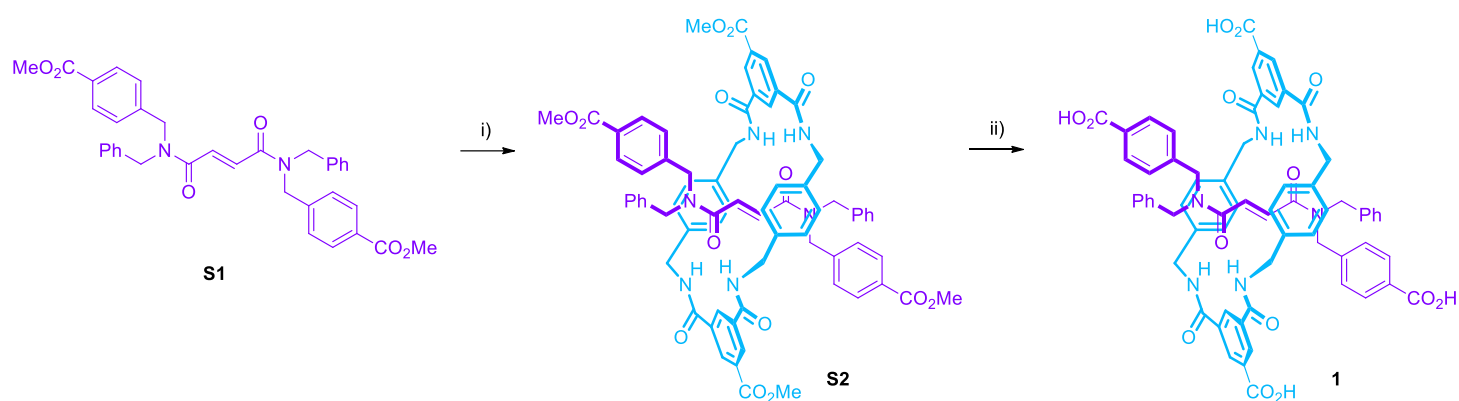

**Scheme S1.** Synthesis of interlocked tetraacid **1** and the corresponding intermediate. Reaction conditions: i) *p*-xylylenediamine, 5-(methoxycarbonyl)isophthaloyl chloride, Et<sub>3</sub>N, CHCl<sub>3</sub>, 25 °C, 4 h; ii) LiOH·H<sub>2</sub>O, H<sub>2</sub>O/DMF/THF (1:1.5:3), 70 °C, 16 h, then neutralization with HCl 6M.

### Amine **S3**

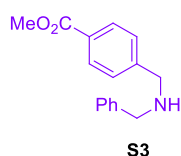

The synthesis and characterization of **S3** are described in the following reference: D. Chianelli, P. V. Rucker, J. Roland, D. C. Tully, J. Nelson, X. Liu, B. Bursulaya, E. D. Hernandez, J. Wu, M. Prashad, T. Schalma, Y. Liu, A. Chu, J. Schmeits, D. J. Huang, R. Hill, D. Bao, J. Zoll, Y. Kim, T. Groessl, P. McNamara, B. Liu, W. Richmond, I. Sancho-Martinez, A. Phimister, H. M. Seidel, M. K. Badman, S. B. Joseph, B. Laffitte, V. Molteni, *J. Med. Chem.* **2020**, *63*, 3868-3880.

## Thread S1

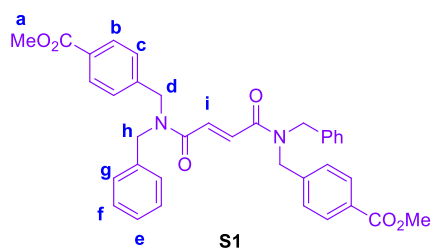

A solution of fumaryl chloride (0.7 mL, 6.54 mmol) in chloroform (50 mL) was added dropwise to a solution of amine **S3** (3.67 g, 14.38 mmol) and Et<sub>3</sub>N (3.2 mL, 22.88 mmol) in chloroform (100 mL) under N<sub>2</sub> atmosphere at 0 °C. The resulting mixture was stirred for 24 hours at room temperature and then, washed with HCl 1 M (2 x 150 mL), sat. NaHCO<sub>3</sub> (2 x 150 mL) and brine (1 x 100 mL). The organic phase was dried over anhydrous MgSO<sub>4</sub> and concentrated under reduced pressure. The residue was purified by column chromatography on silica gel using a CHCl<sub>3</sub>/acetone (95/5) mixture as eluent, to give the title product as a white solid (**S1**, 3.15 g, 82 %); m.p. 129-131 °C; <sup>1</sup>H NMR (400 MHz, CDCl<sub>3</sub>, mixture of rotamers) δ (ppm) = 8.04-7.97 (m, 4H, H<sub>b</sub>), 7.61-7.13 (m, 16H, H<sub>c+g+e+i</sub>), 4.68-4.58 (m, 8H, H<sub>d+h</sub>), 3.94 (s, 3H, H<sub>a</sub>), 3.91 (s, 3H, H<sub>a</sub>); <sup>13</sup>C NMR (101 MHz, CDCl<sub>3</sub>, mixture of rotamers) δ (ppm) = 166.9 (CO), 166.7 (CO), 165.9 (CO), 165.8 (CO), 165.8 (CO), 142.0 (C), 141.3 (C), 136.4 (C), 135.7 (C), 132.5 (CH), 132.4 (CH), 130.4 (CH), 130.1 (CH), 130.0 (CH), 129.6 (CH), 129.2 (CH), 128.9 (CH), 128.5 (CH), 128.2 (CH), 127.9 (CH), 126.8 (CH), 126.8 (CH), 126.7 (CH), 52.4 (CH<sub>3</sub>), 52.3 (CH<sub>3</sub>), 50.6 (CH<sub>2</sub>), 50.1 (CH<sub>2</sub>), 49.0 (CH<sub>2</sub>), 48.6(CH<sub>2</sub>). HRMS (ESI) calculated for C<sub>36</sub>H<sub>35</sub>N<sub>2</sub>O<sub>6</sub> [M + H]<sup>+</sup> 591.2495, found 591.2490 (-0.84 ppm).

## Rotaxane S2

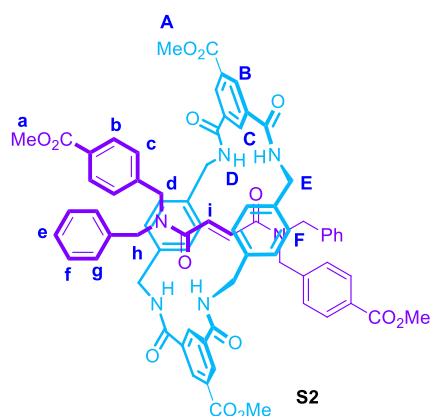

Thread **S1** (1.5 g, 2.54 mmol) and Et<sub>3</sub>N (5.5 mL, 39.89 mmol) in anhydrous CHCl<sub>3</sub> (400 mL) were stirred vigorously whilst solutions of *p*-xylylenediamine (2.42 g, 17.68 mmol) in anhydrous CHCl<sub>3</sub> (20 mL) and 5-(methoxycarbonyl)isophthaloyl chloride (4.62 g, 17.68 mmol) in anhydrous CHCl<sub>3</sub> (20 mL) were simultaneously added over a period of 4 h using motor-driven syringe pumps. After the addition, the resulting suspension was filtered through a Celite<sup>®</sup> pad and the filtrate was washed with water (2 x 50 mL), a saturated solution of NaHCO<sub>3</sub> (2 x 50 mL), a solution of HCl (1M) and brine (2 x 50 mL). The organic phase was then dried over MgSO<sub>4</sub>, filtered and the solvent removed under reduced pressure. The resulting residue was subjected to column chromatography (silica gel) using a CH<sub>2</sub>Cl<sub>2</sub>:MeOH mixture (98:2) to yield the target [2]rotaxane (**S2**, 0.67 g, 21%). m.p. > 200 °C; <sup>1</sup>H NMR (400 MHz, CDCl<sub>3</sub>, mixture of rotamers) δ (ppm) = 8.81-8.77 (m, 4H, H<sub>B</sub>), 8.53-8.44 (m, 2H, H<sub>C</sub>), 8.01 (t, *J* = 7.6 Hz, 2H, H<sub>D</sub>), 7.63-6.69 (m, 24H, H<sub>D+F+b+c+e+f+g</sub>), 6.11-5.90 (m, 2H, H<sub>i</sub>), 5.16 (bs, 4H, H<sub>E</sub>), 4.67-4.24 (m, 8H, H<sub>d+h</sub>), 4.02-3.91 (m, 12H, H<sub>A+a</sub>), 3.46 (bs, 4H, H<sub>E'</sub>); <sup>13</sup>C NMR (101 MHz, CDCl<sub>3</sub>, mixture of rotamers) δ (ppm) = 166.3 (CO), 166.1 (CO), 165.9 (CO), 165.8 (CO), 164.4 (CO), 164.3 (CO), 164.2 (CO), 140.4 (C), 140.3 (C), 138.9 (C), 138.7 (C), 138.3 (C), 138.2 (C), 138.1 (C), 135.3 (CH), 135.2 (CH), 133.9 (CH), 133.8 (CH), 133.2 (CH), 132.3 (CH), 132.0 (CH), 130.8 (CH), 130.5 (CH), 130.3 (CH), 130.2 (CH), 130.1 (CH), 130.0 (CH), 129.8 (CH), 129.6 (CH), 129.3 (CH), 129.3 (CH), 129.1 (CH), 129.0 (CH), 128.8 (CH), 125.7 (CH), 125.6 (CH), 125.4 (CH), 52.8 (CH<sub>3</sub>), 52.7 (CH<sub>3</sub>), 52.5 (CH<sub>3</sub>), 51.9 (CH<sub>2</sub>), 51.4 (CH<sub>2</sub>), 51.2 (CH<sub>2</sub>), 51.1 (CH<sub>2</sub>), 50.9 (CH<sub>2</sub>), 43.4 (CH<sub>2</sub>), 43.3 (CH<sub>2</sub>). HRMS (ESI) calculated for C<sub>72</sub>H<sub>67</sub>N<sub>6</sub>O<sub>14</sub> [M + H]<sup>+</sup> 1239.4715, found 1239.4735 (+1.62 ppm).

## Rotaxane 1

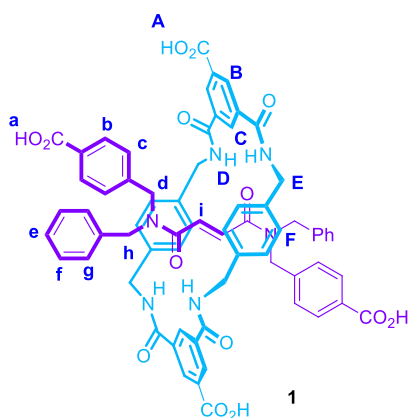

A solution of LiOH·H<sub>2</sub>O (0.068 g, 1.6 mmol) in H<sub>2</sub>O (2 mL) was added to a solution of rotaxane **S2** (0.100 g, 0.08 mmol) in DMF (3 mL) and THF (6 mL), and heated at 70 °C for 16 h. After that time, THF was removed under reduced pressure and HCl was added until pH 1 was reached. The solvent was removed by filtration and the resulting solid was extensively washed with water, chloroform and diethyl ether. The product was obtained as a white solid (**1**, 0.090 g, 95%). m.p. > 200 °C; <sup>1</sup>H NMR (400 MHz, DMSO-*d*<sub>6</sub>, mixture of rotamers) δ (ppm) = 13.16 (bs, 4H, H<sub>A+a</sub>), 8.67-8.18 (m, 12H, H<sub>B+C+b+e</sub>), 7.84-6.91 (m, 24H, H<sub>D+F+c+f+g</sub>), 6.10-5.94 (m, 2H, H<sub>i</sub>), 4.48-4.06 (m, 16H, H<sub>E+d+h</sub>); <sup>13</sup>C NMR (101 MHz, DMSO-*d*<sub>6</sub>, mixture of rotamers) δ (ppm) = 167.0 (CO), 166.6 (CO), 166.3 (CO), 165.5 (CO), 165.4 (CO), 164.1 (CO), 164.0 (CO), 163.9 (CO), 141.3 (C), 140.0 (C), 139.9 (C), 137.6 (C), 136.1 (C), 135.0 (CH), 134.9 (CH), 134.2 (CH), 134.1 (CH), 134.0 (CH), 132.0 (CH), 131.7 (CH), 131.1 (CH), 129.9 (CH), 129.8 (CH), 129.7 (CH), 129.3 (CH), 129.2 (CH), 129.1 (CH), 129.0 (CH), 128.9 (CH), 128.8 (CH), 128.7 (CH), 128.4 (CH), 128.3 (CH), 128.2 (CH), 127.7 (CH), 127.5 (CH), 127.4 (CH), 126.3 (CH), 126.2 (CH), 51.1 (CH<sub>2</sub>), 50.7 (CH<sub>2</sub>), 49.8 (CH<sub>2</sub>), 49.7 (CH<sub>2</sub>), 49.5 (CH<sub>2</sub>), 42.9 (CH<sub>2</sub>). HRMS (ESI) calculated for C<sub>68</sub>H<sub>59</sub>N<sub>6</sub>O<sub>14</sub> [M + H]<sup>+</sup> 1183.4084, found 1183.4064 (-1.69 ppm).

### 3. Synthesis of UMUMOFs-7 and -8

The tetratopic ligand **1** was combined with the metallic salt in a mixture of solvents DMF:EtOH:H<sub>2</sub>O (3:3:2) with one drop of HNO<sub>3</sub>. This solution was filtered by using EMD Millipore Millex™ Sterile Syringe Filters 0.45 μm pore size and distributed in borosilicate glass vials with GL18 screw cap. The solution was then heated using the heating ramp shown in the graph below (Figure S1): heating from 20 °C to 80 °C for 15 minutes, then this temperature was maintained for 48 hours and, finally, a slow cooling process for 24 hours. The obtained crystals were filtered and exhaustively washed with DMF and CHCl<sub>3</sub>, and then dried under vacuum.

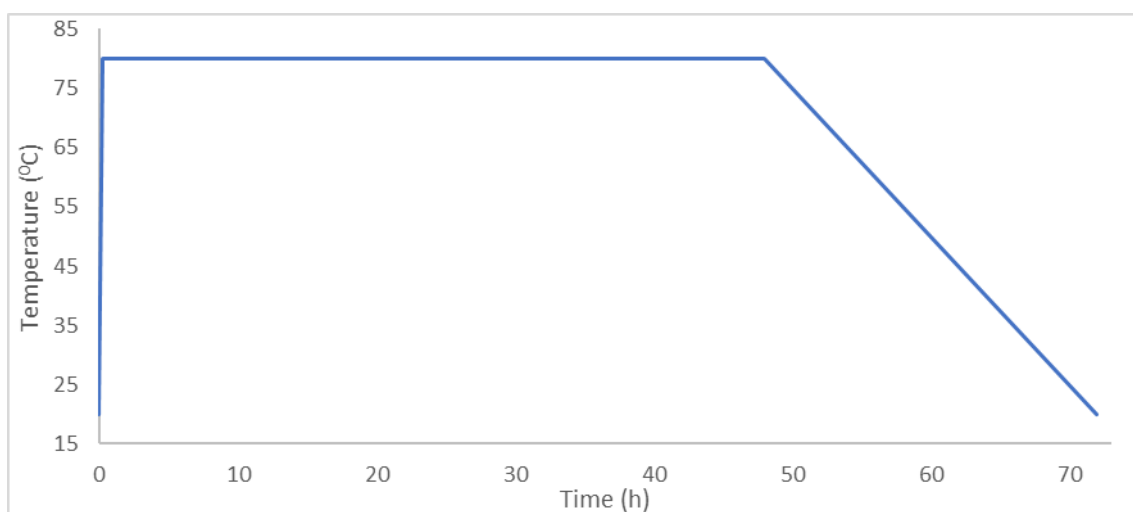

**Figure S1.** Heating ramp program.

#### UMUMOF -7

A solution of Cu(NO<sub>3</sub>)<sub>2</sub>·H<sub>2</sub>O (10.5 mg, 0.056 mmol) in EtOH (1.7 mL), water (1.1 mL) and a drop of HNO<sub>3</sub> was added to a solution of rotaxane **1** (16.5 mg, 0.014 mmol) in DMF (1.7 mL). The general procedure was followed, obtaining blue crystals (**UMUMOF-7**, 24 mg, 64%). Elemental Analysis (C<sub>68</sub>H<sub>58</sub>Cu<sub>2</sub>N<sub>6</sub>O<sub>16</sub>·1.95 C<sub>3</sub>H<sub>7</sub>NO·1.2 CHCl<sub>3</sub>, %) found (calculated): C 54.57 (54.58), H 4.59 (4.60), N 6.73 (6.74). FTIR (ATR, cm<sup>-1</sup>)  $\nu$  = 3334 (w, NH), 1651 (vs, C-OCu), 1594 (vs, C-OCu), 1358 (s, ArC-O), 1331 (s, ArC-O).



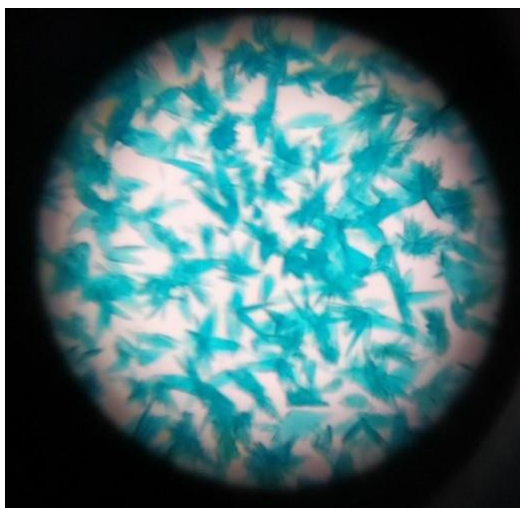

**Figure S2.** Photograph of **UMUMOF-7** crystals observed using an optical microscope.

### **UMUMOF-8**

A solution of  $\text{Co}(\text{NO}_3)_2 \cdot 6\text{H}_2\text{O}$  (20.8 mg, 0.072 mmol) in EtOH (1.1 mL), water (0.7 mL) and a drop of  $\text{HNO}_3$  was added to a solution of rotaxane **1** (10.57 mg, 0.009 mmol) in DMF (1.1 mL). The general procedure was followed, obtaining reddish crystals (**UMUMOF-8**, 15 mg, 60%). Elemental Analysis ( $\text{C}_{68}\text{H}_{60}\text{Co}_2\text{N}_6\text{O}_{19} \cdot 3.05 \text{C}_3\text{H}_7\text{NO} \cdot 2.5 \text{C}_2\text{H}_6\text{O} \cdot 2.04 \text{CHCl}_3$ , %) found (calculated): C 54.47 (56.46), H 5.40 (5.39), N 6.83 (6.83). FTIR (ATR,  $\text{cm}^{-1}$ )  $\nu = 3339$  (w, NH), 1650 (vs, C-OCO), 1597 (vs, C-OCO), 1351 (s, ArC-O), 1343 (s, ArC-O).

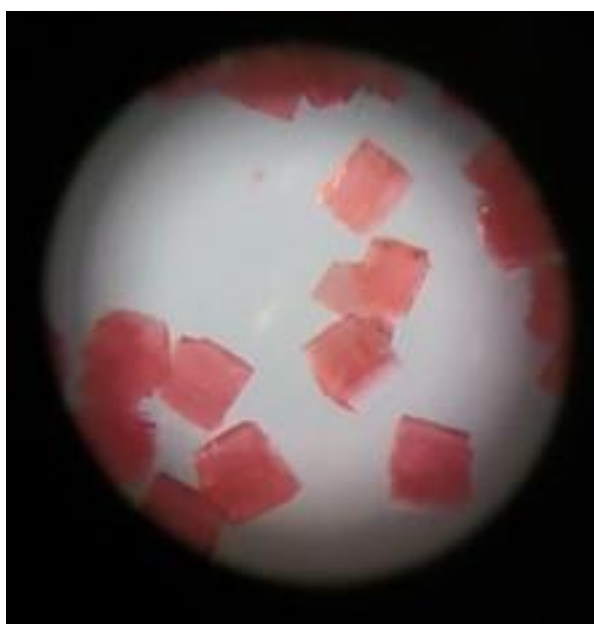

**Figure S3.** Photograph of **UMUMOF-8** crystals observed using an optical microscope.

#### 4. Scanning Electron Microscopy

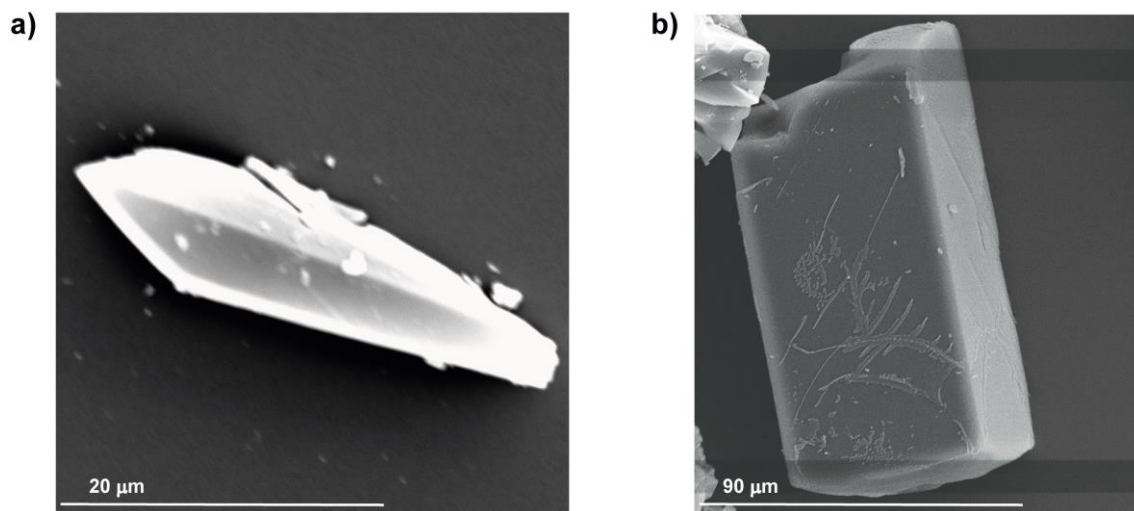

**Figure S4.** SEM micrographs of a: (a) UMUMOF-7 crystal; (b) UMUMOF-8 crystal.

#### 5. Thermogravimetric Analysis

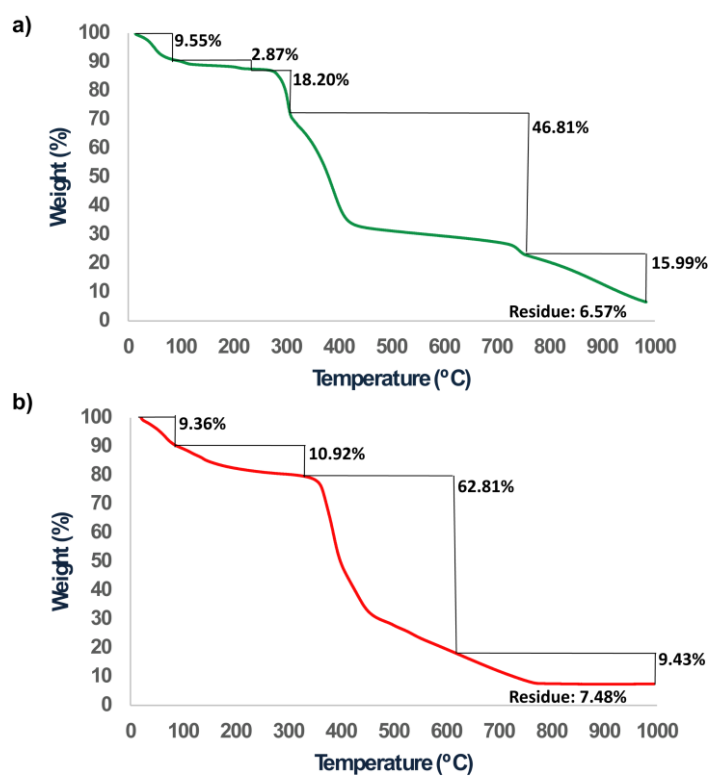

**Figure S5.** Thermogravimetric analyses (5 °C/minute, N<sub>2</sub> stream) of UMUMOF-7 (a) and UMUMOF-8 (b).

## 6. Adsorption experiments

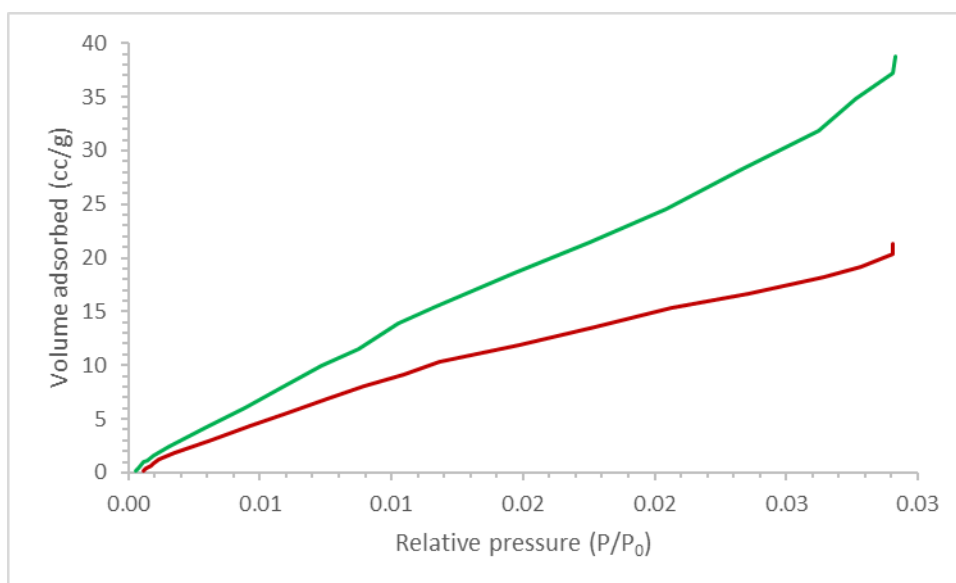

**Figure S6.** CO<sub>2</sub> adsorption isotherms ( $P_{0,override} = 26142$  Torr, outgas time = 4 h,  $T_{outgas} = 523$  K,  $T_{bath} = 273$  K) of **UMUMOF-7** (green) and **UMUMOF-8** (red).

**Table S1.** CO<sub>2</sub> DR adsorption data of **UMUMOFs-7 and -8**.

| Measurement                           | UMUMOF-7 | UMUMOF-8 |
|---------------------------------------|----------|----------|
| Pore surface area (m <sup>2</sup> /g) | 295.959  | 333.905  |
| Pore volume (cc/g)                    | 0.101    | 0.114    |
| Correlation coefficient               | 0.9995   | 0.9997   |

## 7. X-ray Powder Diffraction Analysis

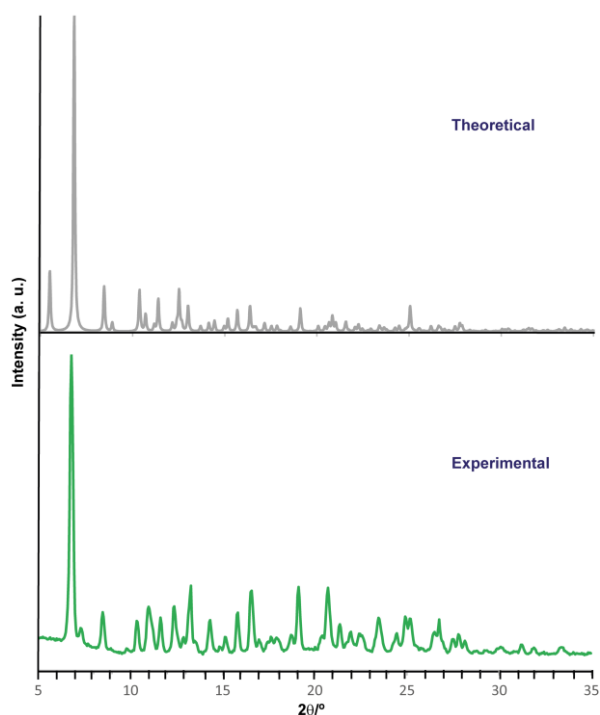

**Figure S7.** Theoretical (grey) and experimental (green) XRPD pattern of **UMUMOF-7** (Cu  $K_{\alpha}$  = 1.5406 Å, electrical current = 40 mA, electric power = 45 kV, step size = 0.015°).

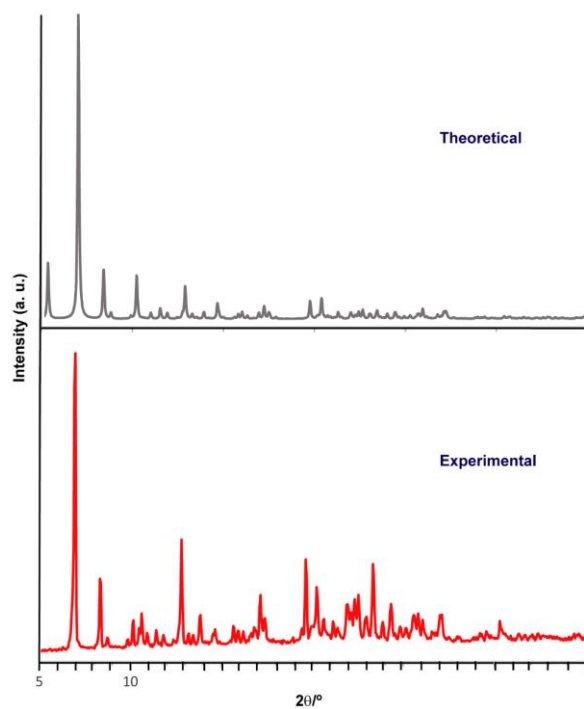

**Figure S8.** Theoretical (grey) and experimental (red) XRPD pattern of **UMUMOF-8** (Cu  $K_{\alpha}$  = 1.5406 Å, electrical current = 40 mA, electric power = 45 kV, step size = 0.015°).

## 8. Infrared Spectroscopy

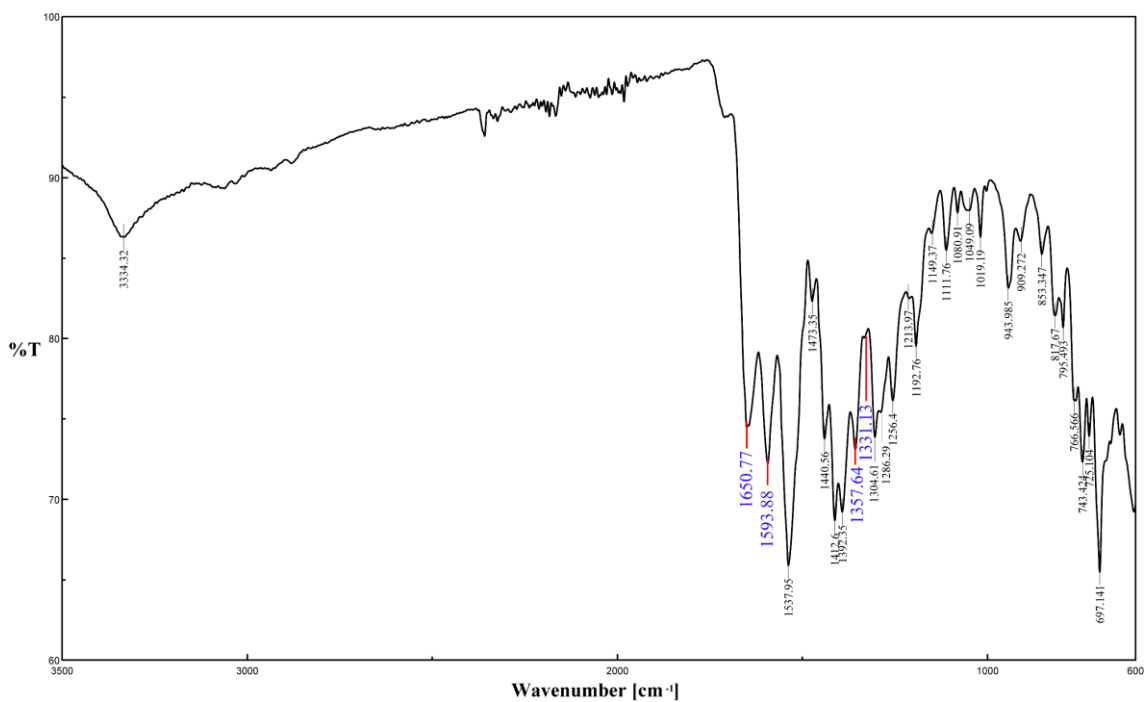

**Figure S9.** Infrared spectrum (ATR) of **UMUMOF-7**, highlighting in blue the asymmetric and symmetric stretching vibration of carboxylate-copper coordination bonds.

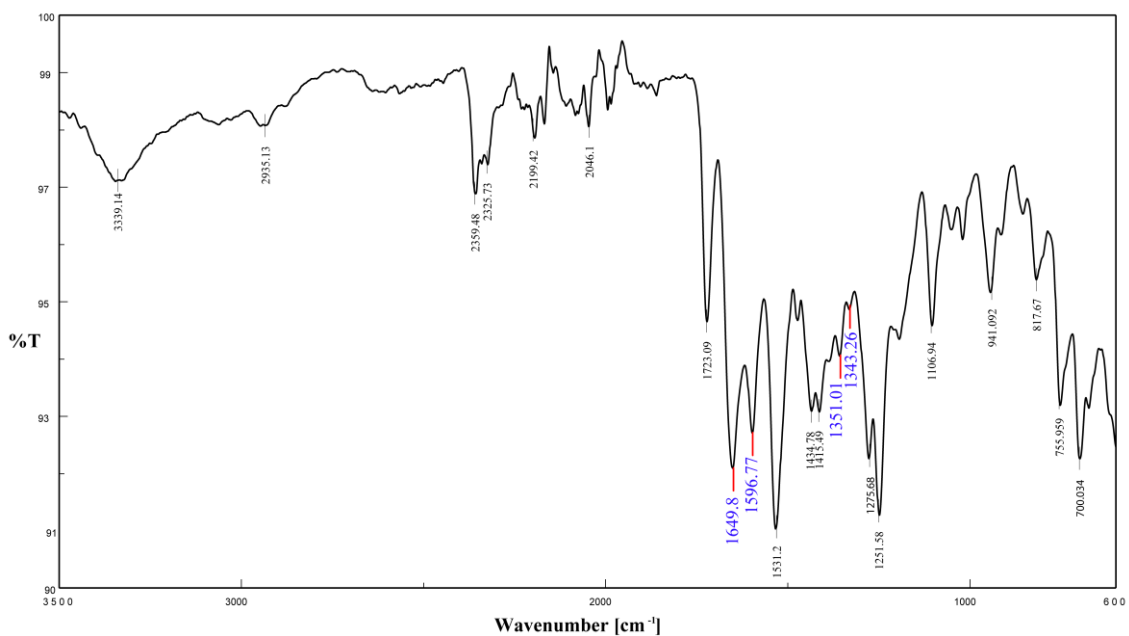

**Figure S10.** Infrared spectrum (ATR) of **UMUMOF-8**, highlighting in blue the asymmetric and symmetric stretching vibration of carboxylate-cobalt coordination bonds.

## 9. Crystal data and structure refinement for UMUMOFs-7 and -8

### UMUMOF-7

Single crystals of  $C_{68}H_{58}Cu_2N_6O_{16}$  [As\_III\_140\_0msp\_a] were obtained by following the above described procedure. Intensities were registered at low temperature (100.0 K) on a Bruker D8 QUEST system equipped with a multilayer monochromator and a Mo K/ $\alpha$  Incoatec microfocus sealed tube ( $\lambda = 0.71073 \text{ \AA}$ ). Absorption corrections were based on multi-scans (program SADABS). Using Olex2,<sup>1</sup> the structure was solved with the SHELXT<sup>2</sup> structure solution program using Intrinsic Phasing and refined with the SHELXL<sup>3</sup> refinement package using Least Squares minimization. Hydrogen atoms were included using a riding model. A solvent mask was calculated and 520 electrons were found in a volume of  $2197 \text{ \AA}^3$  in 1 void per unit cell. This is consistent with the presence of 6 molecules of  $H_2O$  per Asymmetric Unit, which account for 480 electrons per unit cell. The structure was deposited with CSD (deposition number CCDC 2340441).

**Table S2.** Crystal data and structure refinement for **UMUMOF-7** (CCDC 2340441).

|                                           |                                             |                                                     |                              |
|-------------------------------------------|---------------------------------------------|-----------------------------------------------------|------------------------------|
| <b>Bond precision:</b>                    | <b>C-C = 0.0052 <math>\text{\AA}</math></b> | <b>Wavelength = 0.71073 <math>\text{\AA}</math></b> |                              |
| <b>Cell:</b>                              | a = 32.307(2) $\text{\AA}$                  | b = 14.1238(11) $\text{\AA}$                        | c = 16.6531(12) $\text{\AA}$ |
|                                           | $\alpha = 90^\circ$                         | $\beta = 97.426(3)^\circ$                           | $\gamma = 90^\circ$          |
| <b>Temperature:</b>                       | 100 K                                       |                                                     |                              |
|                                           | Calculated                                  | Reported                                            |                              |
| <b>Volume</b>                             | 7535.0(9) $\text{\AA}^3$                    | 7535.1(10) $\text{\AA}^3$                           |                              |
| <b>Space group</b>                        | <i>C2/c</i>                                 | <i>C12/c1</i>                                       |                              |
| <b>Hall group</b>                         | - <i>C2yc</i>                               | - <i>C2yc</i>                                       |                              |
| <b>Moiety formula</b>                     | $C_{34}H_{29}CuN_3O_8$<br>[+solvent]        | $C_{68}H_{58}Cu_2N_6O_{16}$                         |                              |
| <b>Sum formula</b>                        | $C_{34}H_{29}CuN_3O_8$<br>[+solvent]        | $C_{68}H_{58}Cu_2N_6O_{16}$                         |                              |
| <b>Mr</b>                                 | 671.15 g/mol                                | 1342.28 g/mol                                       |                              |
| <b>Dx, g cm<sup>-3</sup></b>              | 1.183                                       | 1.183                                               |                              |
| <b>Z</b>                                  | 8                                           | 4                                                   |                              |
| <b><math>\mu</math> (mm<sup>-1</sup>)</b> | 0.627                                       | 0.627                                               |                              |
| <b>F000</b>                               | 2776.0                                      | 2776.0                                              |                              |
| <b>F000'</b>                              | 2779.80                                     |                                                     |                              |
| <b>h,k,l<sub>max</sub></b>                | 46,20,23                                    | 46,20,23                                            |                              |
| <b>N<sub>ref</sub></b>                    | 11559                                       | 11539                                               |                              |
| <b>T<sub>min</sub>, T<sub>max</sub></b>   | 0.956 K, 0.969 K                            | 0.694 K, 0.746 K                                    |                              |

|                          |                                                                          |
|--------------------------|--------------------------------------------------------------------------|
| <b>T<sub>min</sub></b>   | 0.888 K                                                                  |
| <b>Correction method</b> | = # Reported T Limits: T <sub>min</sub> = 0.694 T <sub>max</sub> = 0.746 |
| <b>AbsCorr =</b>         |                                                                          |
| <b>MULTI-SCAN</b>        |                                                                          |
| <b>Data</b>              | Θ <sub>max</sub> = 30.555°                                               |
| <b>completeness =</b>    |                                                                          |
| <b>0.998</b>             |                                                                          |

## UMUMOF-8

Single crystals of C<sub>68</sub>H<sub>60</sub>Co<sub>2</sub>N<sub>6</sub>O<sub>19</sub> [AS\_IV\_\_0msp] were obtained by following the above described procedure. Intensities were registered at low temperature (100.0 K) on a Bruker D8 QUEST system equipped with a multilayer monochromator and a Mo K/α Incoatec microfocus sealed tube (λ = 0.71073 Å). Absorption corrections were based on multi-scans (program SADABS). Using Olex2,<sup>1</sup> the structure was solved with the SHELXT<sup>2</sup> structure solution program using Intrinsic Phasing and refined with the SHELXL<sup>3</sup> refinement package using Least Squares minimization. Hydrogen atoms were included using a riding model. One of the phenyl groups at the thread, originated due to a translation movement, is disordered, and was modelled. A solvent mask was calculated and 499 electrons were found in a volume of 2465 Å<sup>3</sup> in 1 void per unit cell. This is consistent with the presence of 2 molecules of H<sub>2</sub>O and 1 molecule of DMF per Asymmetric Unit, which account for 480 electrons per unit cell. The structure was deposited with CSD (deposition number CCDC 2340442).

**Table S3.** Crystal data and structure refinement for **UMUMOF-8** (CCDC 2340442).

|                        |                                                                                              |                                                                                |                   |
|------------------------|----------------------------------------------------------------------------------------------|--------------------------------------------------------------------------------|-------------------|
| <b>Bond precision:</b> | <b>C-C = 0.0055 Å</b>                                                                        | <b>Wavelength = 0.71073 Å</b>                                                  |                   |
| <b>Cell:</b>           | a = 16.7950(2) Å                                                                             | b = 33.970(11) Å                                                               | c = 13.8988(12) Å |
|                        | α = 90°                                                                                      | β = 90°                                                                        | γ = 90°           |
| <b>Temperature:</b>    | 100 K                                                                                        |                                                                                |                   |
|                        | Calculated                                                                                   | Reported                                                                       |                   |
| <b>Volume</b>          | 7929.6(8) Å <sup>3</sup>                                                                     | 7929.6(8) Å <sup>3</sup>                                                       |                   |
| <b>Space group</b>     | <i>Pnma</i>                                                                                  | <i>Pnma</i>                                                                    |                   |
| <b>Hall group</b>      | <i>-P2ac2n</i>                                                                               | <i>-P2ac2n</i>                                                                 |                   |
| <b>Moiety formula</b>  | C <sub>68</sub> H <sub>60</sub> Co <sub>2</sub> N <sub>6</sub> O <sub>19</sub><br>[+solvent] | C <sub>68</sub> H <sub>60</sub> Co <sub>2</sub> N <sub>6</sub> O <sub>19</sub> |                   |
| <b>Sum formula</b>     | C <sub>68</sub> H <sub>60</sub> Co <sub>2</sub> N <sub>6</sub> O <sub>19</sub><br>[+solvent] | C <sub>68</sub> H <sub>60</sub> Co <sub>2</sub> N <sub>6</sub> O <sub>19</sub> |                   |

|                                                                                                |                 |                                  |
|------------------------------------------------------------------------------------------------|-----------------|----------------------------------|
| <b>Mr</b>                                                                                      | 1383.08 g/mol   | 1383.08 g/mol                    |
| <b>Dx,g cm<sup>-3</sup></b>                                                                    | 1.158           | 1.159                            |
| <b>Z</b>                                                                                       | 8               | 4                                |
| <b>μ (mm<sup>-1</sup>)</b>                                                                     | 0.483           | 0.483                            |
| <b>F000</b>                                                                                    | 2864.0          | 2864.0                           |
| <b>F000'</b>                                                                                   | 2868.17         |                                  |
| <b>h,k,l<sub>max</sub></b>                                                                     | 22,45,18        | 22,45,18                         |
| <b>N<sub>ref</sub></b>                                                                         | 10048           | 10028                            |
| <b>T<sub>min</sub>,T<sub>max</sub></b>                                                         | 0.935 K,0.981 K | 0.660 K,0.746 K                  |
| <b>T<sub>min</sub>'</b>                                                                        | 0.935 K         |                                  |
| <b>Correction method= # Reported T Limits: T<sub>min</sub> = 0.660 T<sub>max</sub> = 0.746</b> |                 |                                  |
| <b>AbsCorr = MULTI-SCAN</b>                                                                    |                 |                                  |
| <b>Data completeness =</b>                                                                     |                 | <b>Θ<sub>max</sub> = 28.314°</b> |
| <b>0.998</b>                                                                                   |                 |                                  |



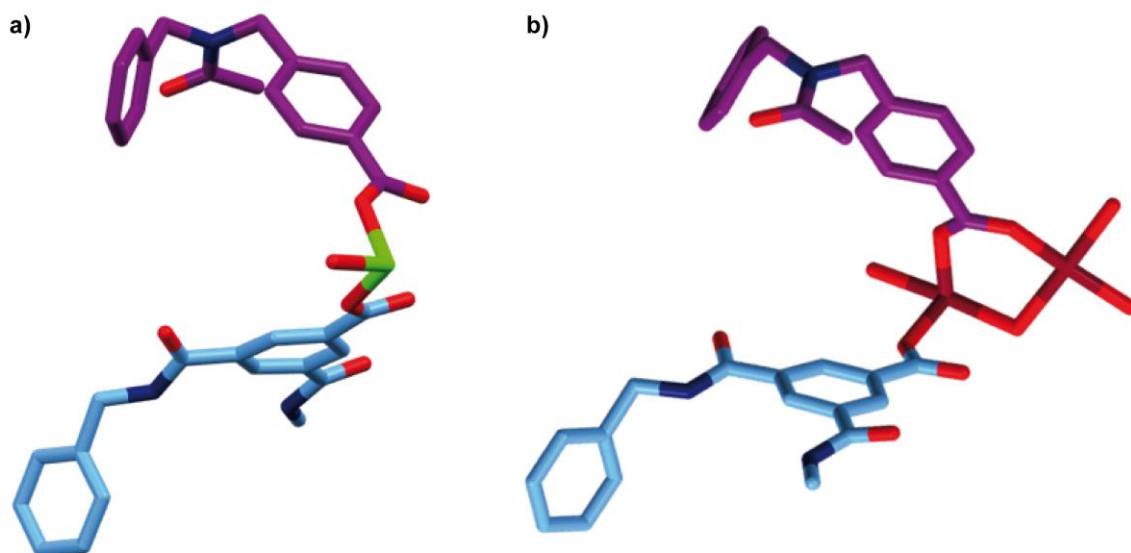

**Figure S11.** Stick representation of the asymmetric units of: (a) **UMUMOF-7** and (b) **UMUMOF-8**.

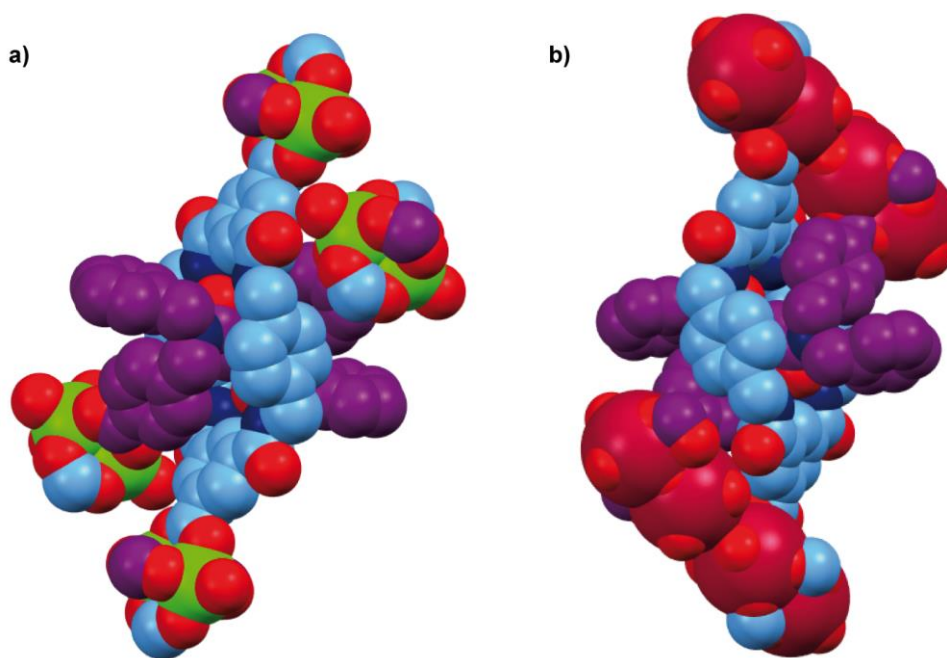

**Figure S12.** Spacefill representation of a single unit of tetratopic ligand **1** within the crystalline array of: (a) **UMUMOF-7** and (b) **UMUMOF-8**.

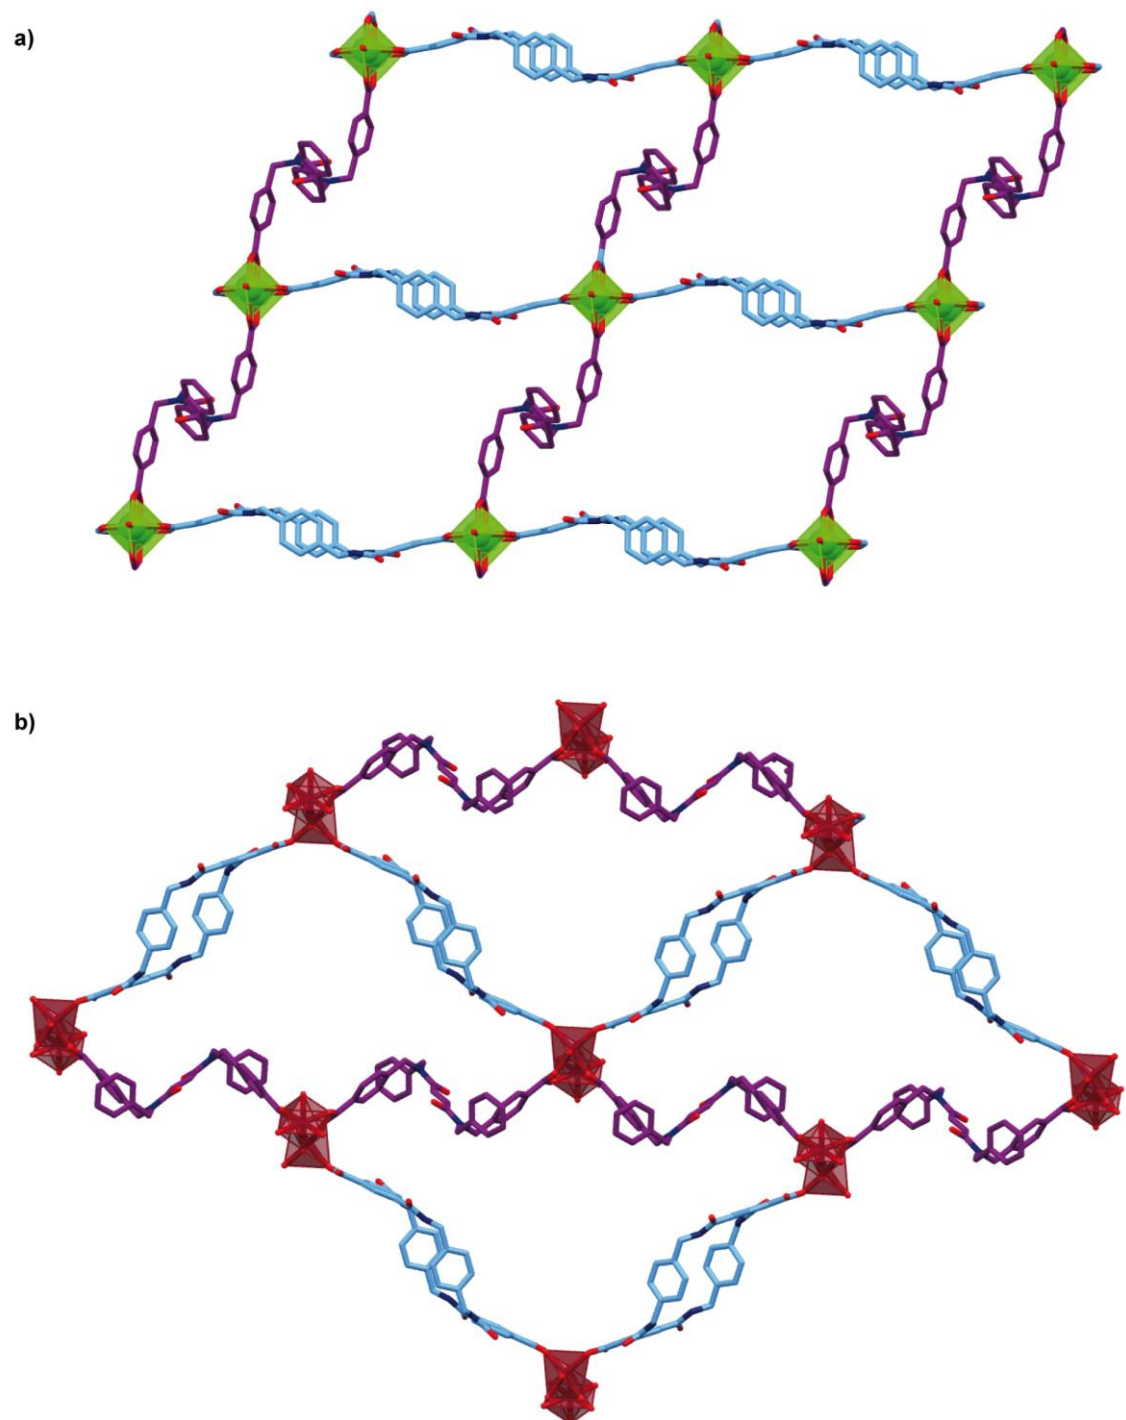

**Figure S13.** 2D-stick representation of four interconnected metallogrids of: (a) **UMUMOF-7** and (b) **UMUMOF-8**. Only one component of the interlocked ligand (thread or macrocycle) is shown for clarity.

## 10. X-ray diffraction analyses using different solvents

In order to study the influence of different solvents in the structure, a batch of **UMUMOF-8** crystals was dried under vacuum for 23 hours and a suitable crystal was selected and placed in the vacuum set of the X-ray Diffractometer, where an additional vacuum cycle was accomplished. The measurement was performed under nitrogen atmosphere to avoid atmospheric water uptake.

A second batch of crystals was washed three times with fresh ethanol and then dried under vacuum for 24 hours. After that time, the evacuated crystals were immersed in the corresponding solvent (ethanol or toluene) for 24 hours. Then, selected crystals were measured using the X-ray Diffractometer under nitrogen atmosphere. In the studies using bromobenzene as solvent, this solvent was dripped on selected crystals due to difficulties during the extraction of crystals directly immerse in bromobenzene.

Analogous experiments using **UMUMOF-7** were carried out, but the obtained crystallographic data did not allow the structural analysis of the crystals.

**Table S4.** Single crystal X-ray Diffraction analysis of dried **UMUMOF-8** using different solvents.

| Solvent             | Cell Parameters |        |        |              |             |              |                     | Space group | Bravais lattice |
|---------------------|-----------------|--------|--------|--------------|-------------|--------------|---------------------|-------------|-----------------|
|                     | a (Å)           | b (Å)  | c (Å)  | $\alpha$ (°) | $\beta$ (°) | $\gamma$ (°) | v (Å <sup>3</sup> ) |             |                 |
| -                   | 16.854          | 34.039 | 13.827 | 90           | 90          | 90           | 7932.0              | <i>Pnma</i> | Orthorhombic P  |
| <b>Ethanol</b>      | 16.721          | 34.003 | 13.837 | 90           | 90          | 90           | 7867.3              | <i>Pnma</i> | Orthorhombic P  |
| <b>Toluene</b>      | 16.729          | 33.928 | 13.861 | 90           | 90          | 90           | 7867.2              | <i>Pnma</i> | Orthorhombic P  |
| <b>Bromobenzene</b> | 16.821          | 34.219 | 13.905 | 90           | 90          | 90           | 8004.1              | <i>Pnma</i> | Orthorhombic P  |

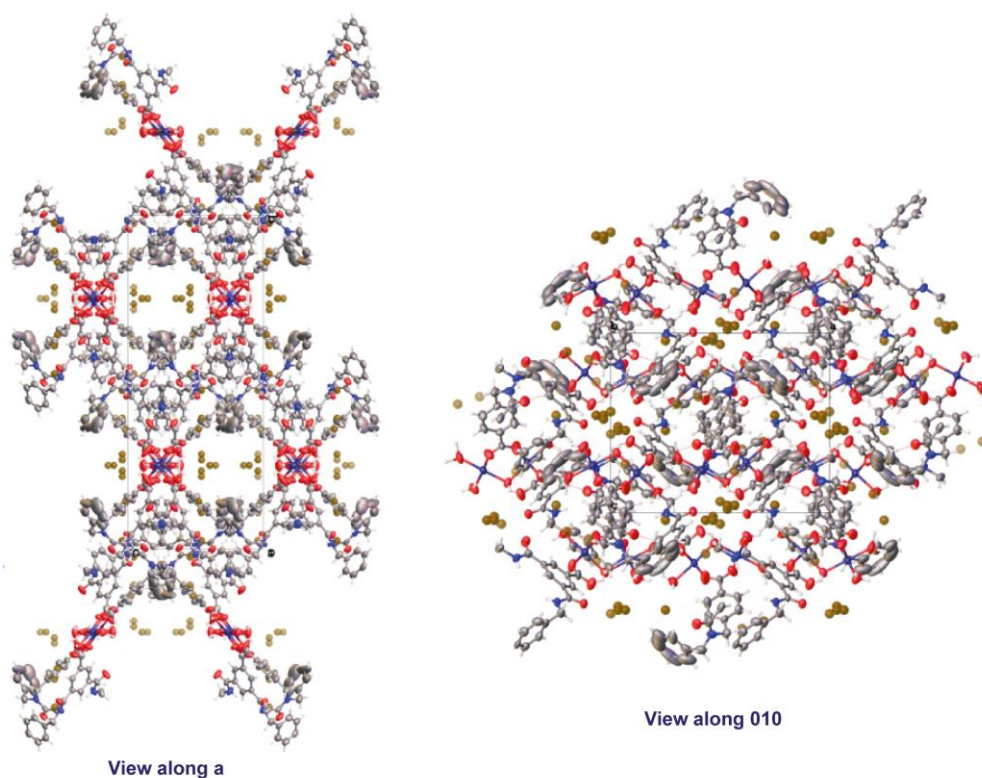

**Figure S14.** Single crystal X-ray Diffraction structure of evacuated crystals of **UMUMOF-8** showing the growth of asymmetric units along different views. Electron density of remaining non-evacuated solvent molecules is shown in brown.

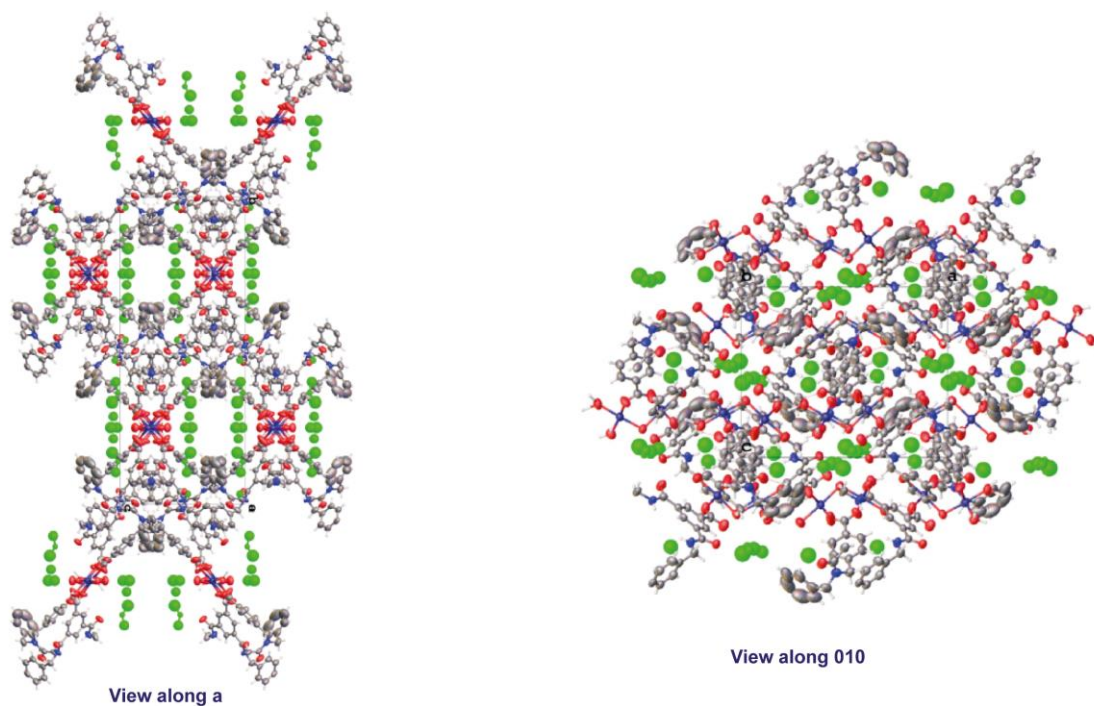

**Figure S15.** Single crystal X-ray Diffraction structure of **UMUMOF-8** crystals embedded in ethanol showing the growth of asymmetric units along different views. Electron density of ethanol molecules is shown in green.

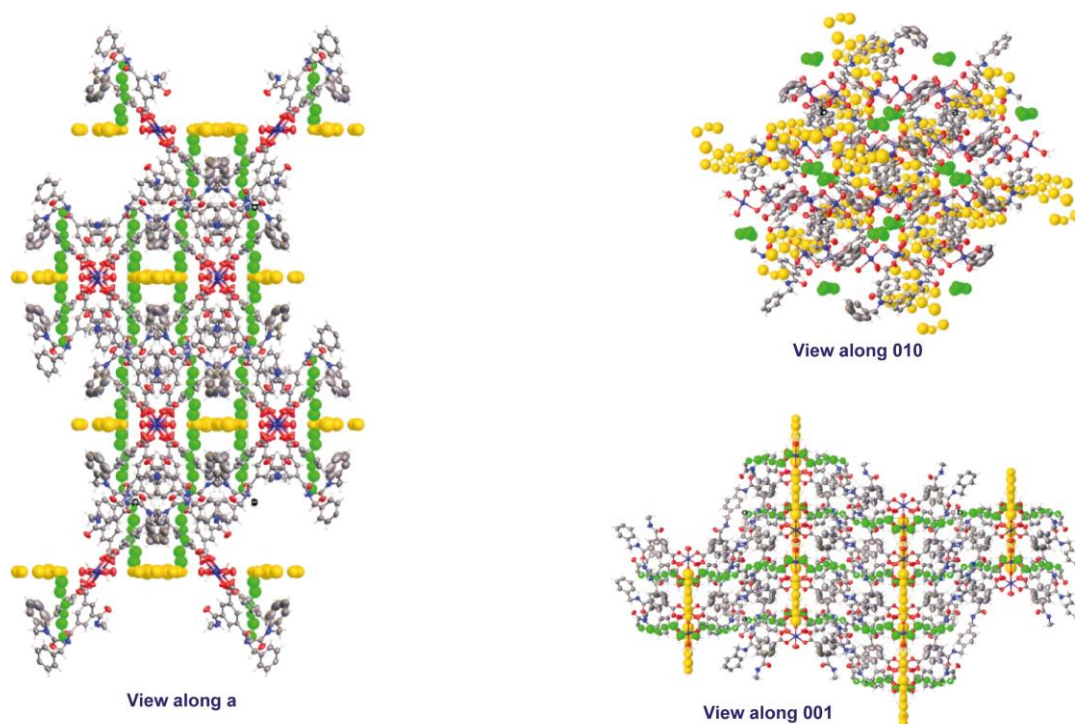

**Figure S16.** Single crystal X-ray Diffraction structure of **UMUMOF-8** crystals embedded in toluene showing the growth of asymmetric units along different views. Electron density of ethanol molecules is shown in green and that of toluene in yellow.

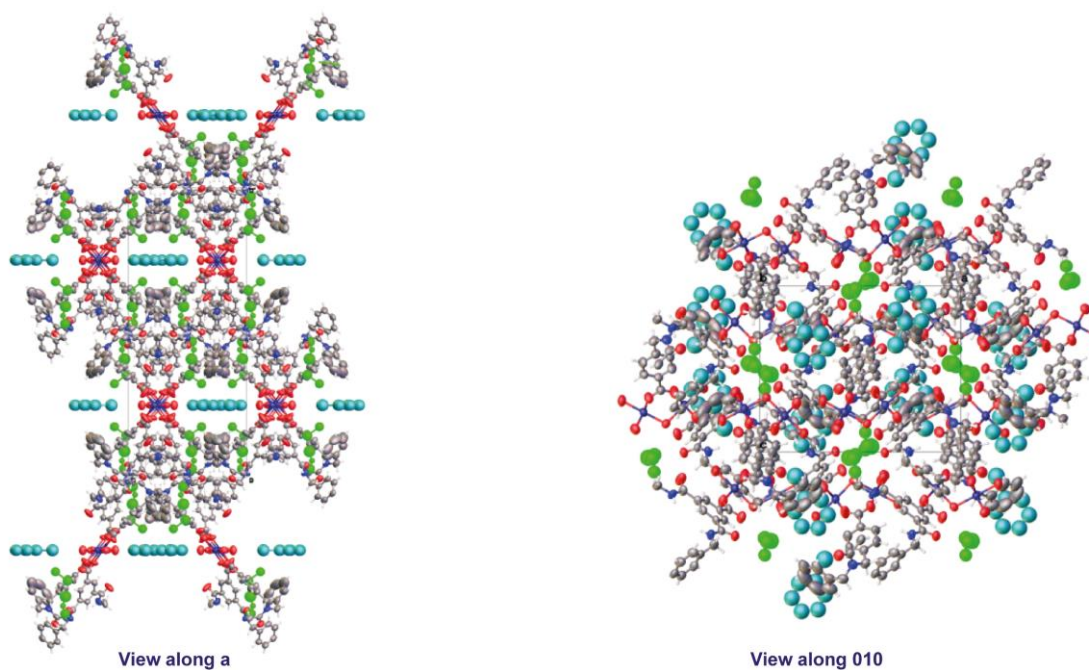

**Figure S17.** Single crystal X-ray Diffraction structure of **UMUMOF-8** crystals embedded in bromobenzene showing the growth of asymmetric units along different views. Electron density of ethanol molecules is shown in green and that of bromobenzene in blue.

## 11. $^1\text{H}$ and $^{13}\text{C}$ NMR spectra

S1 ( $^1\text{H}$  NMR, 400 MHz,  $\text{CDCl}_3$ , 298 K)

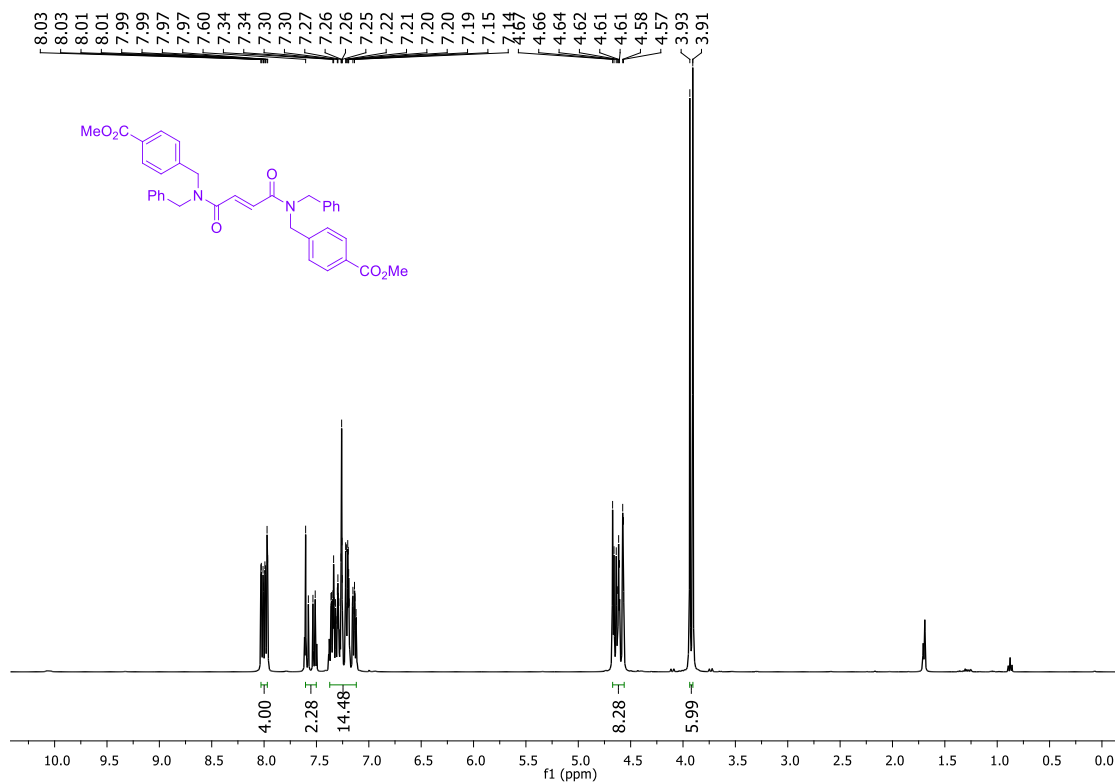

S1 ( $^{13}\text{C}$  NMR, 101 MHz,  $\text{CDCl}_3$ , 298 K)

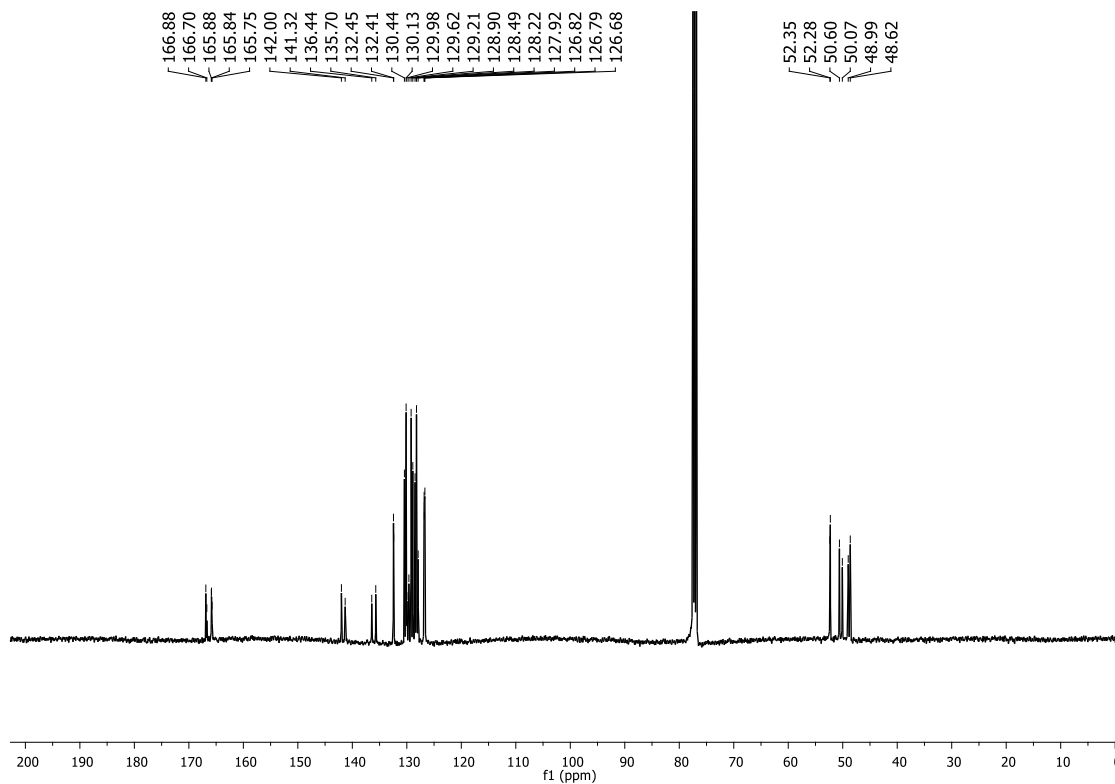

S2 (<sup>1</sup>H NMR, 400 MHz, CDCl<sub>3</sub>, 298 K)

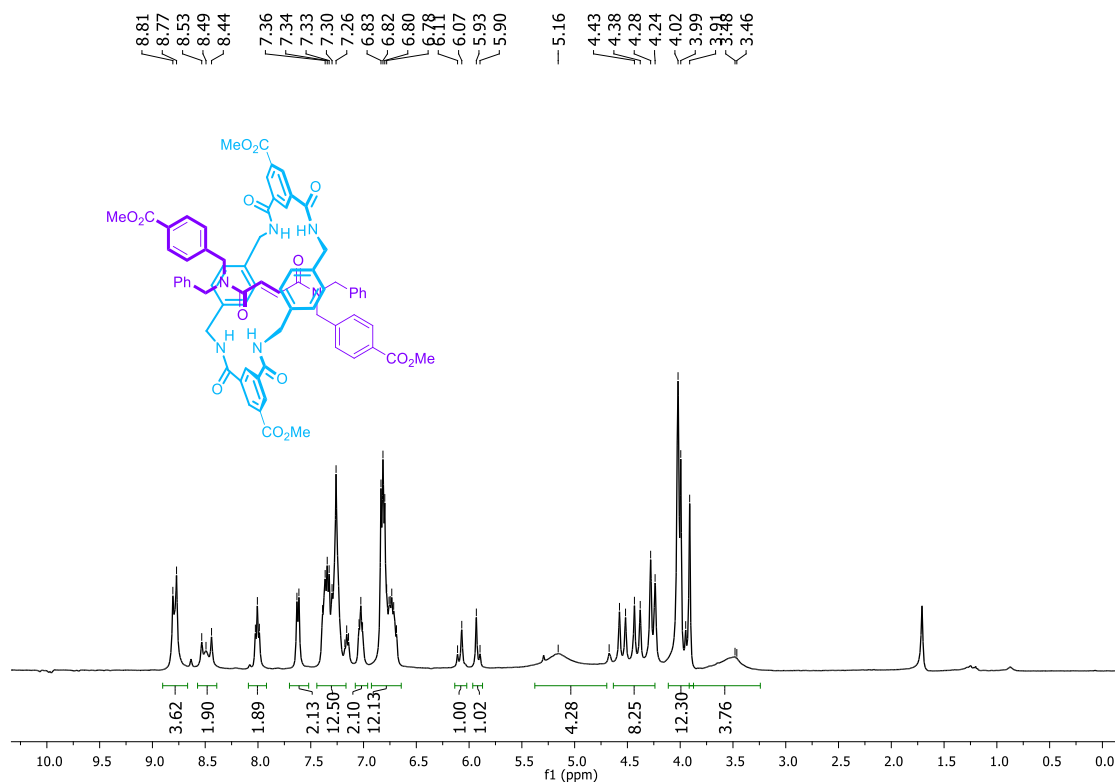

S2 (<sup>13</sup>C NMR, 101 MHz, CDCl<sub>3</sub>, 298 K)

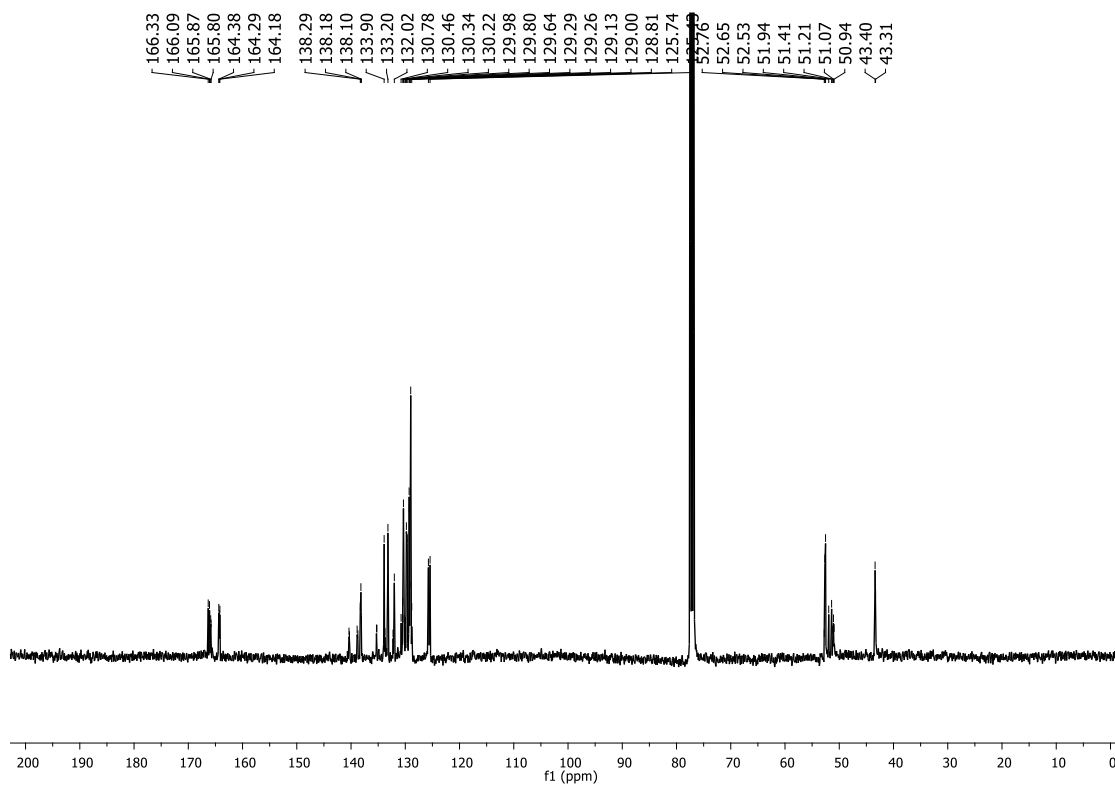

**1** ( $^1\text{H}$  NMR, 400 MHz,  $\text{DMSO-}d_6$ , 298 K)

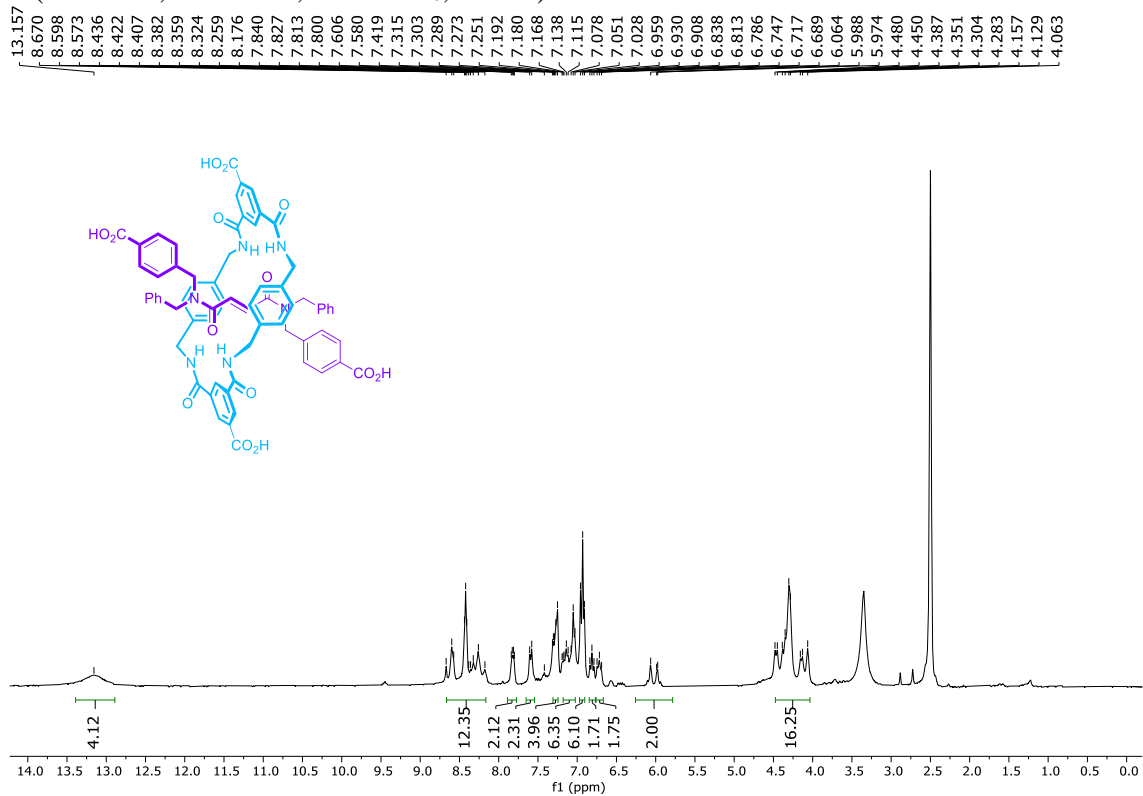

**1** ( $^{13}\text{C}$  NMR, 101 MHz,  $\text{DMSO-}d_6$ , 298 K)

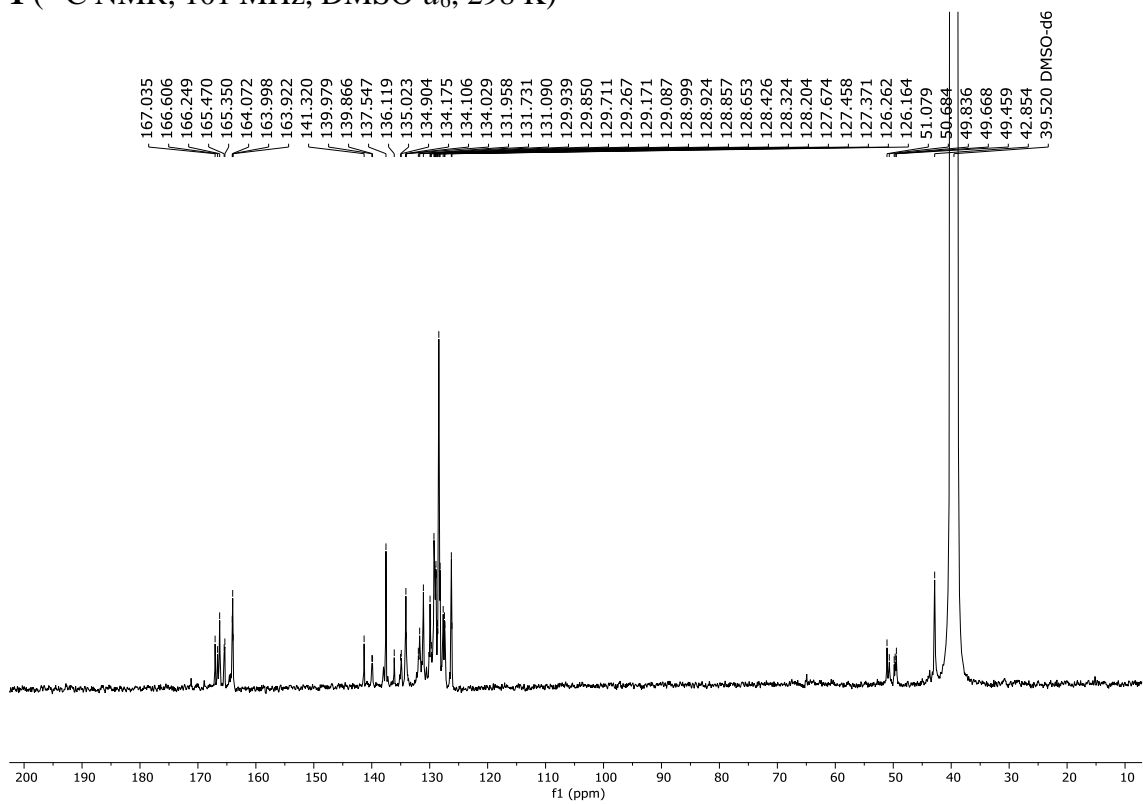



---

<sup>1</sup> O. V. Dolomanov, L. J. Bourhis, R. J. Gildea, J. A. K. Howard, H. Puschmann, *J. Appl. Cryst.* **2009**, *42*, 339-341.

<sup>2</sup> A. Altomare, C. Cascarano, A. Giacovazzo, J. Guagliardi, *J. Appl. Cryst.* **1993**, *26*, 343-350.

<sup>3</sup> a) G. M. Sheldrick, University of Göttingen: Göttingen, Germany, **2014**; b) G. M. Sheldrick, *Acta Cryst.* **2015**, *C71*, 3-8.
